# Supplementary material
Source: Springer Nature journal article supplement (https://www.springermedizin.de/resource/supplementary/12968_2013_3954_MOESM6_ESM.pdf/9584962)

**MD****MVED ( $s^{-1}$ )****VDS ( $s^{-1}$ )****VDS/MVED****Lateral**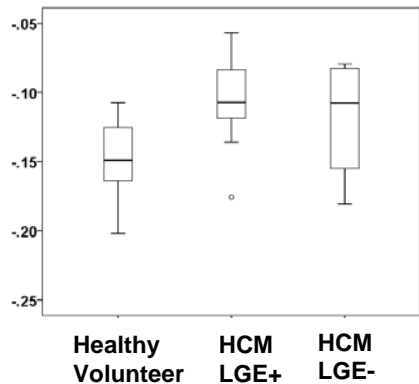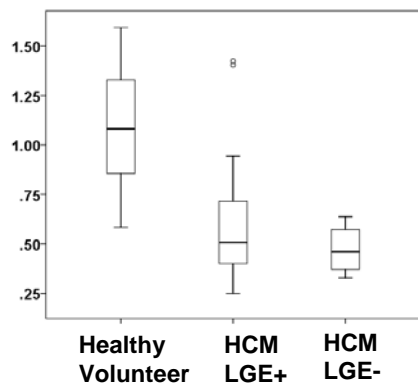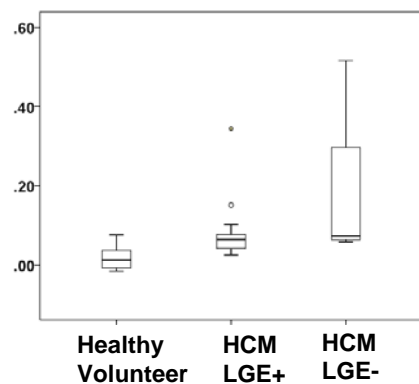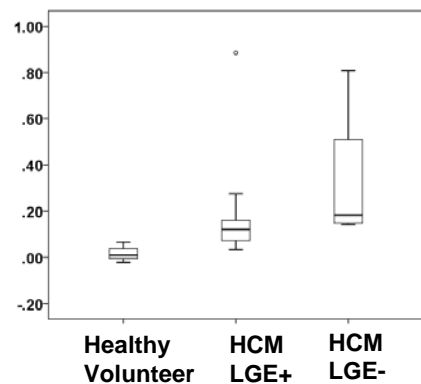**Septal**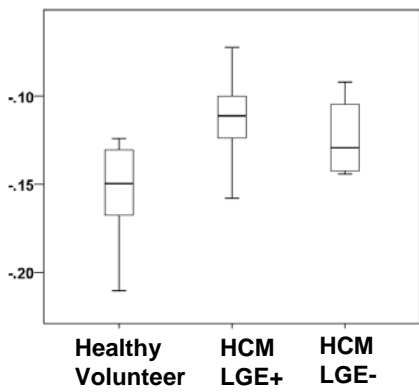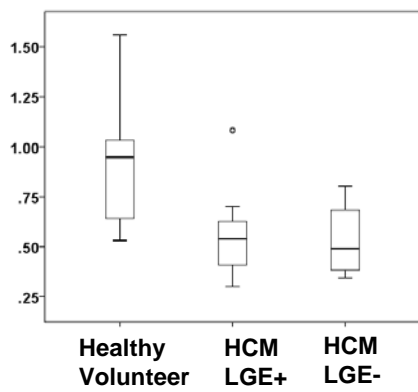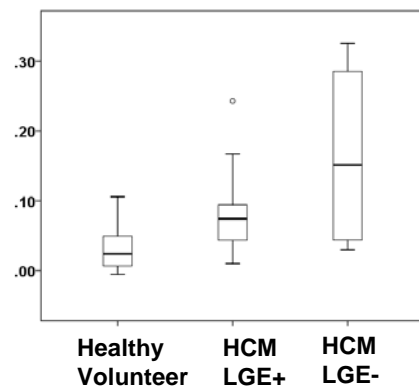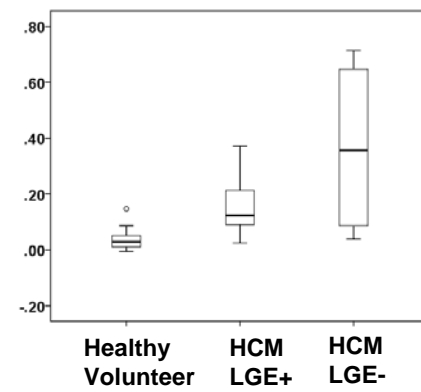

Supplement: MOESM6 [file 9584962]
